# Supplementary material for: Allosteric pathway identification through network analysis: from molecular dynamics simulations to interactive 2D and 3D graphs
Source: Royal Society of Chemistry journal article supplement (doi:10.1039/c4fd00024b), 2014-01-01

### Supplementary Information

**Scheme S1. Structural organization and possible signaling pathways of receptors tyrosine kinases (RTKs) (*e.g.*, KIT).** (A) RTKs of type III comprise an extracellular ligand binding domain, a single transmembrane helix, a juxtamembrane region (JMR), a conserved kinase domains (proximal and distal) linked by a hinge and a carboxy-terminal tail (C-terminal). Phosphorylation sites are shown. (B) Activation of KIT induced by binding of SCF-ligand leads to dimerization, phosphorylation of specific tyrosine residues, and recruitment of several proteins at the intracellular portion of the receptors. Several proteins (*e.g.*, the cytokine receptor-associated Janus kinase, JAK2) bind directly to the receptor, whereas Ras/Raf pathways and AKT pathway need several specific adaptor molecules. JAK2 converts the latent monomeric form of the STAT molecules to the activated dimeric form through tyrosine phosphorylation. The dimers bind to specific DNA response elements and are able to induce transcription. All possible pathways result in nuclear activation of genes regulating cell growth, survival and mast cell activation. (C) Superimposed crystallographic structures of the cytoplasmic region of KIT and CSF-1R receptors in the inactive form show several differences. The proteins are presented as cartoon, CSF-1R is in light blue and KIT is in light grey. The key structural fragments of receptors in the inactive and the active conformations are highlighted in color. The JMR is in yellow and in orange ; the A-loop is in red and magenta; the C $\alpha$ -helix is in cyan and blue, in KIT and CSF-1R respectively. (D) The constitutively activated receptor KIT stabilized by oncogenic point mutation (red spots with black contour), prompts alternative signaling routes, either through FES or by direct interaction with STAT5. These pathways result in nuclear activation of genes related with cell growth, survival and mast cell activation. Scheme was adapted from M. Arock's personal communication.

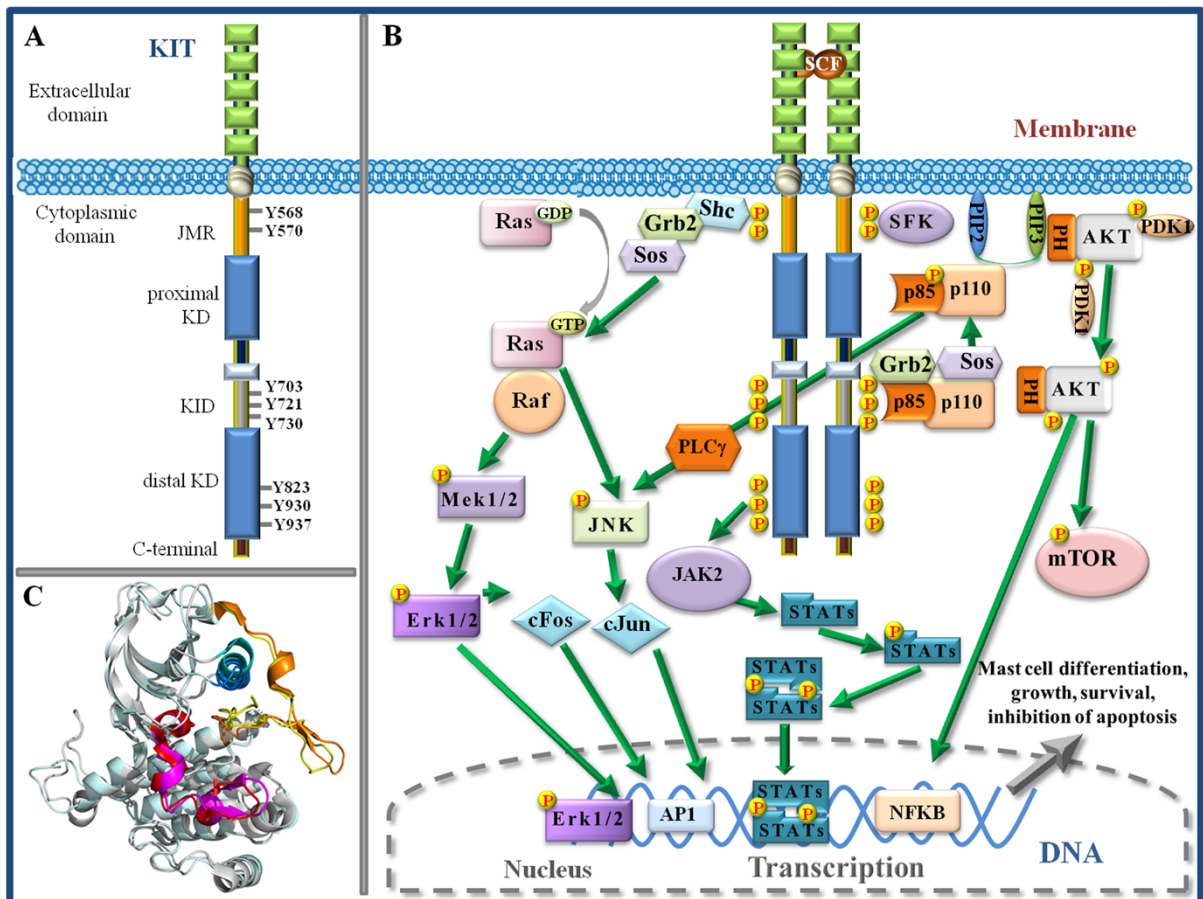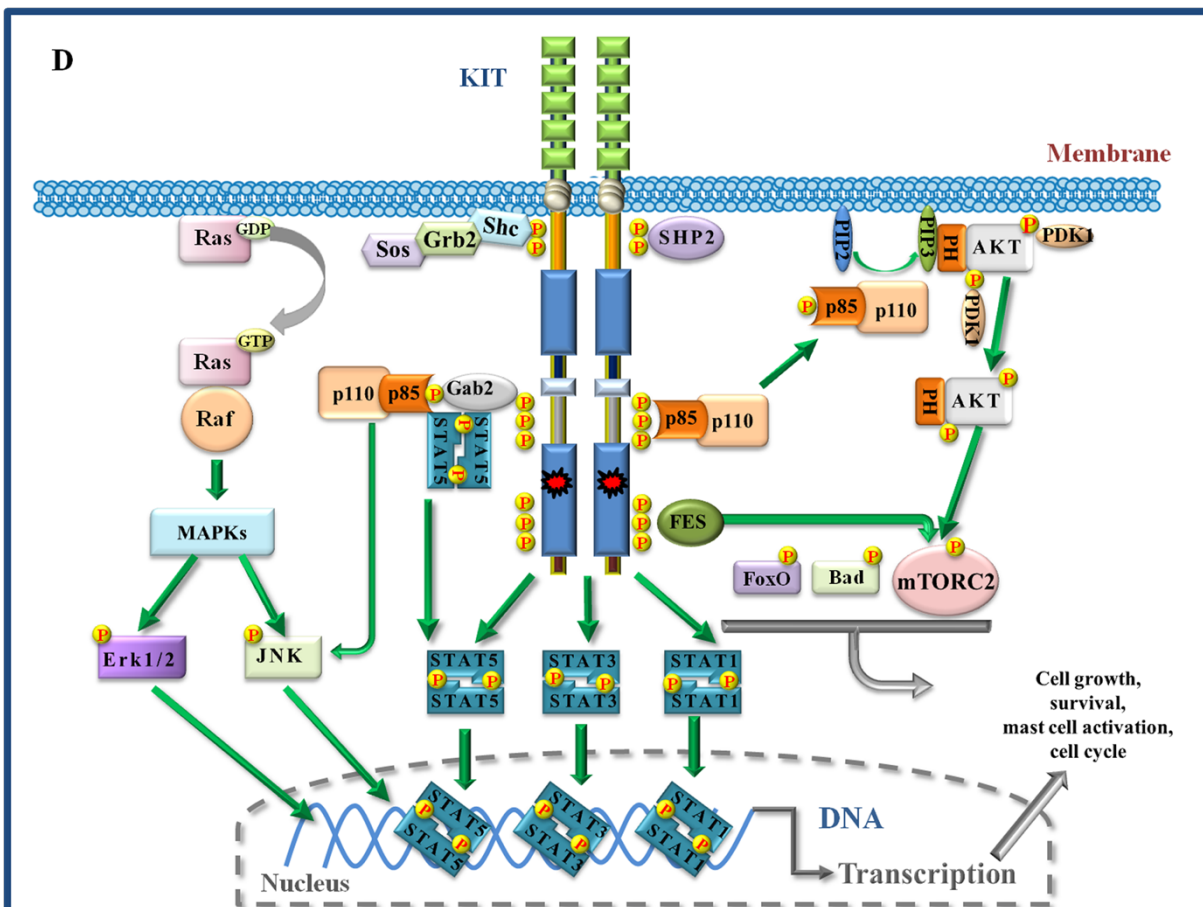

Supplement: c4fd00024b1.pdf [file c4fd00024b1.pdf]
